**Does the application of Robotics improve outcomes of pedicle screw  
insertion in spine surgery compared to conventional fluoroscopy guidance?**

**A protocol for Systematic Review and Meta-Analysis**

Authors:

1. Vishal Kumar, MS, Department of Orthopaedics, Postgraduate Institute of Medical Education and Research, Chandigarh, India
2. Vishnu Baburaj, MS, Department of Orthopaedics, Postgraduate Institute of Medical Education and Research, Chandigarh, India
3. Praseon Kumar, MS, Department of Orthopaedics, Postgraduate Institute of Medical Education and Research, Chandigarh, India
4. Sarvdeep Singh Dhatt, MS, Department of Orthopaedics, Postgraduate Institute of Medical Education and Research, Chandigarh, India

*Correspondence to:* Dr. Vishnu Baburaj, Senior Resident, Department of Orthopaedics, Postgraduate Institute of Medical Education and Research, Chandigarh, India. 160012

Email: [drvbms@gmail.com](mailto:drvbms@gmail.com)

**Abstract**

**Background:** Pedicle screw insertion is routinely carried out in spine surgery that has traditionally been performed under fluoroscopy guidance. Robotic guidance has recently gained popularity in order to improve the accuracy of screw placement. However, it is unclear whether the use of robotics alters the accuracy of screw placement or clinical outcomes.

**Objectives:** This systematic review aims to compare the results of pedicle screws inserted under fluoroscopy guidance, with those inserted under robotic guidance, in terms of both short-term radiographic outcomes, as well as long-term clinical outcomes.

**Methods:** This systematic review will be conducted according to the PRISMA guidelines. A literature search will be conducted on the electronic databases of PubMed, Embase, Scopus, and Ovid with a pre-determined search strategy. A manual bibliography search of included studies will also be done. Original articles in English that directly compare pedicle screw insertion under robotic guidance to those inserted under fluoroscopy guidance will be included. Data on outcomes will be extracted from included studies and analysis carried out with the help of appropriate software.

## 1. **Background**

Pedicle screw insertion is routinely carried out in spine surgery for several indications including traumatic, infective, degenerative and neoplastic conditions and spinal deformities. Conventionally, it has been carried out with free-hand techniques under fluoroscopy guidance where anatomical landmarks are used to guide pedicle entry site and direction. However, the use of this technique has frequently been associated with misplaced screws [1]. Adjacent neurovascular structures and visceral organs are prone to injury by such malpositioned screws. Technical advancements have led to the application of navigation and robotics in spine surgery to improve the accuracy of screw placement.

## 2. **Need for review**

Whether the use of robotic guidance leads to improved accuracy and clinical outcomes remains controversial. Some studies report improved screw accuracy, reduced rate of complications and intra-operative radiation exposure with robotic guidance [2-7]. Some other studies, including two RCTs and a meta-analysis have

concluded that Robotics have no added benefit over free-hand placement under fluoroscopy guidance [8-11].

### **Objective**

To compare the outcomes of pedicle screws inserted under fluoroscopy guidance with those inserted under robotic guidance.

### **3. PICO framework for the study**

- a. Participants : Adult human subjects undergoing Spine surgery
- b. Intervention : Pedicle screws inserted under robotic guidance
- c. Control : Pedicle screws inserted under fluoroscopy guidance
- d. Outcome : Accuracy of screw placement, mean surgical duration, blood loss, radiation exposure, complication and screw revision rates

### **4. Methods**

This systematic review and meta-analysis will be done according to the Preferred Reporting Items for Systematic Reviews and Meta-analysis (PRISMA) guidelines.

#### *a. Review Protocol*

A protocol of the review will be prepared as per the PRISMA-P guidelines.

#### *b. Eligibility Criteria*

Original research on human adult subjects having spinal pathology undergoing spine surgery with pedicle screw fixation under robotic guidance will be included. The studies should have a comparison group in which pedicle screws are inserted under fluoroscopy guidance. The articles must report on the clinical and radiological outcome parameters. Studies in languages other than English, lower evidence studies such as case reports, case series, animal, cadaveric and biomechanical studies will be excluded.

c. Information Sources and Literature search

Electronic databases of PubMed, Embase, Scopus, and Ovid will be searched using the keywords “Robot\* AND (Spine\* OR (Pedicule Screw))” for studies in English published from inception to date of search. A bibliography search of included studies will also be carried out for more potentially eligible articles.

d. Study Selection

Two authors will separately go through the title and abstract of the search results to narrow down studies using the inclusion and exclusion criteria. In case of any doubt, the full text of the study will be obtained and an assessment made after discussion with all the authors.

e. Data Collection and Data Items

Data from eligible studies will be extracted on excel spreadsheets, which will be cross-checked for accuracy. The following data will be collected:

- Name of first author and publication year
- Study design
- Type of robot used
- Number of participants and their demographic data
- Mean operating time
- Accuracy of screw placement
- Blood loss
- Radiation exposure
- Rate of complications and screw revision.

f. Outcome measures

The outcome measures that would be considered for analysis are as follows:

- Mean operating time
- Accuracy of screw placement
- Blood loss
- Radiation exposure
- Rate of complications
- Rate of screw revision.

g. *Data Analysis and Synthesis*

Both qualitative and quantitative synthesis will be performed, if adequate data is obtained. Meta-analysis would be conducted to compare the pooled estimate of outcomes between robot guided and fluoroscopy guided techniques if reported by more than three studies. RevMan version 5.4 (computer program) will be used for analysis. A fixed or random-effects model will be chosen based on the amount of heterogeneity. 95% confidence intervals will be used, and results would be depicted using forest plots.

h. *Assessment of Risk of Bias*

The methodological index for non-randomized studies (MINORS) tool will be used to assess bias in observational studies, and Cochrane risk of bias tool will be utilized for randomized controlled trials [12, 13].

## 5. **References**

1. Lau D, Terman SW, Patel R, La Marca F, Park P (2013) Incidence of and risk factors for superior facet violation in minimally invasive versus open pedicle screw placement during transforaminal lumbar interbody fusion: a comparative analysis. J Neurosurg Spine 18:356-361

2. Hu X, Ohnmeiss DD, Lieberman IH (2013) Robotic-assisted pedicle screw placement: lessons learned from the first 102 patients. *Eur Spine J* 22:661-666. doi: 10.1007/s00586-012-2499-1
3. Lieberman IH, Hardenbrook MA, Wang JC, Guyer RD (2012) Assessment of pedicle screw placement accuracy, procedure time, and radiation exposure using a miniature robotic guidance system. *Clin Spine Surg* 25:241-248
4. Devito DP, Kaplan L, Dietl R, Pfeiffer M, Horne D, Silberstein B, Hardenbrook M, Kiriyanthan G, Barzilay Y, Bruskin A (2010) Clinical acceptance and accuracy assessment of spinal implants guided with SpineAssist surgical robot: retrospective study. *Spine* 35:2109-2115
5. Barzilay Y, Kaplan L, Libergall M (2008) Robotic assisted spine surgery--a breakthrough or a surgical toy? *The international journal of medical robotics+ computer assisted surgery: MRCAS* 4:195-196
6. Pechlivanis I, Kiriyanthan G, Engelhardt M, Scholz M, Lücke S, Harders A, Schmieder K (2009) Percutaneous placement of pedicle screws in the lumbar spine using a bone mounted miniature robotic system: First experiences and accuracy of screw placement. *Spine* 34:392-398. doi: 10.1097/BRS.0b013e318191ed32
7. Shoham M, Lieberman I, Benzel E, Togawa D, Zehavi E, Zilberstein B, Roffman M, Bruskin A, Fridlander A, Joskowicz L (2007) Robotic assisted spinal surgery—from concept to clinical practice. *Computer Aided Surgery* 12:105-115
8. Kim HJ, Jung WI, Chang BS, Lee CK, Kang KT, Yeom JS (2017) A prospective, randomized, controlled trial of robot-assisted vs freehand pedicle screw fixation in spine surgery. *Int J Med Rob Comput Assisted Surg* 13. doi: 10.1002/rcs.1779

9. Ringel F, Stür C, Reinke A, Preuss A, Behr M, Auer F, Stoffel M, Meyer B (2012) Accuracy of robot-assisted placement of lumbar and sacral pedicle screws: a prospective randomized comparison to conventional freehand screw implantation. *Spine (Phila Pa 1976)* 37:E496-501. doi: 10.1097/BRS.0b013e31824b7767
10. Liu H, Chen W, Wang Z, Lin J, Meng B, Yang H (2016) Comparison of the accuracy between robot-assisted and conventional freehand pedicle screw placement: a systematic review and meta-analysis. *Int J Comput Assisted Radiol Surg* 11:2273-2281
11. Gao S, Lv Z, Fang H (2018) Robot-assisted and conventional freehand pedicle screw placement: a systematic review and meta-analysis of randomized controlled trials. *Eur Spine J* 27:921-930
12. Slim K, Nini E, Forestier D, Kwiatkowski F, Panis Y, Chipponi J (2003) Methodological index for non-randomized studies (MINORS): development and validation of a new instrument. *ANZ journal of surgery* 73:712-716
13. Sterne JA, Savović J, Page MJ, Elbers RG, Blencowe NS, Boutron I, Cates CJ, Cheng H-Y, Corbett MS, Eldridge SM (2019) RoB 2: a revised tool for assessing risk of bias in randomised trials. *bmj* 366
